# Supplementary material
Source: publisher figshare collection journal article supplement (https://frontiersin.figshare.com/ndownloader/files/18656267)
Supplement: Supplementary file [file 18656267]

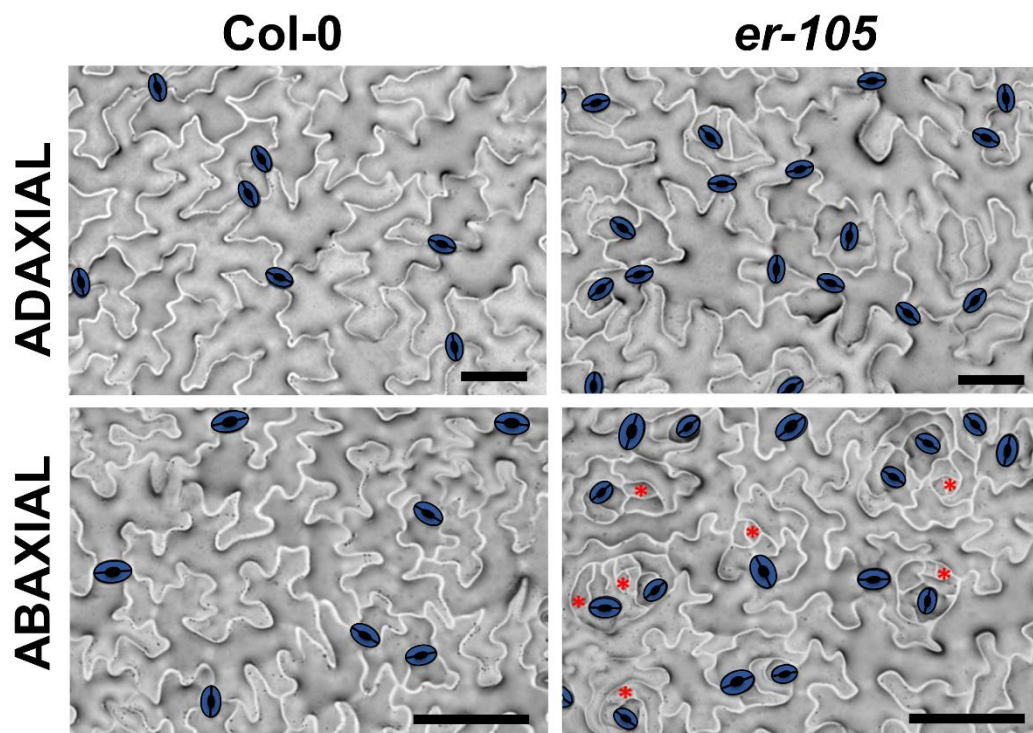

**Supplementary Figure S2.** *er-105* differential phenotypes in both cotyledon epidermis. Representative adaxial and abaxial epidermis of Col-0 and *er-105* mature cotyledons, with stomata false-coloured in blue. Note the presence of arrested lineages (red asterisks) only in the abaxial epidermis of *er-105*. Micrographs were obtained with the dental resin method. Scale bars are 100  $\mu\text{m}$ .
